# Supplementary material
Source: PubMed Central journal article supplement (PMC8990347)
Supplement: NIHMS1783814-supplement-Supp_Materials__Figure_S1-S8__Supp_Table.pdf [file NIHMS1783814-supplement-Supp_Materials__Figure_S1-S8__Supp_Table.pdf]

1 **Antigen cross-presentation in young tumor-bearing hosts promotes CD8<sup>+</sup> T cell terminal**  
2 **differentiation**

3

4 Ardiana Moustaki<sup>1</sup>, Jeremy Chase Crawford<sup>1</sup>, Shanta Alli<sup>1</sup>, Yiping Fan<sup>2</sup>, Shannon Boi<sup>1</sup>, Anthony E Zamora<sup>1</sup>,  
5 Natalie M N McDonald<sup>1,5</sup>, Gang Wu<sup>2</sup>, Joy Nakitandwe<sup>3</sup>, Scott Newman<sup>4</sup>, Scott Foy<sup>4</sup>, Antonina Silkov<sup>4</sup>, Paul  
6 G Thomas<sup>1</sup>, Alberto Pappo<sup>6</sup>, Michael A Dyer<sup>7,8</sup>, Elizabeth Stewart<sup>6,7</sup>, Sara Federico<sup>6</sup>, Ben Youngblood<sup>1\*</sup>

7 <sup>1</sup> Department of Immunology, St. Jude Children's Research Hospital, Memphis, TN 38105, USA

8 <sup>2</sup> Center for Applied Bioinformatics, St. Jude Children's Research Hospital, Memphis, TN 38105, USA

9 <sup>3</sup> Department of Pathology, St. Jude Children's Research Hospital, Memphis, TN 38105, USA

10 <sup>4</sup> Department of Computational Biology, St. Jude Children's Research Hospital, Memphis, TN 38105, USA

11 <sup>5</sup> University of Tennessee Health and Science Center (UTHSC) - Memphis, TN 38163

12 <sup>6</sup> Department of Oncology, St. Jude Children's Research Hospital, Memphis, TN 38105, USA

13 <sup>7</sup> Department of Developmental Neurobiology, St. Jude Children's Research Hospital, Memphis, TN  
14 38105, USA

15 <sup>8</sup> Department of Ophthalmology, University of Tennessee Health Science Center, Memphis, TN 38105,  
16 USA

17

18

19 *Keywords:* T cell exhaustion, tumor microenvironment, age, antigen cross-presentation, pediatric  
20 tumors.

21

22 *\*Correspondence:* [Benjamin.Youngblood@stjude.org](mailto:Benjamin.Youngblood@stjude.org)

23

24

25

26 **Supplementary figures**  
27

28 **Figure S1**

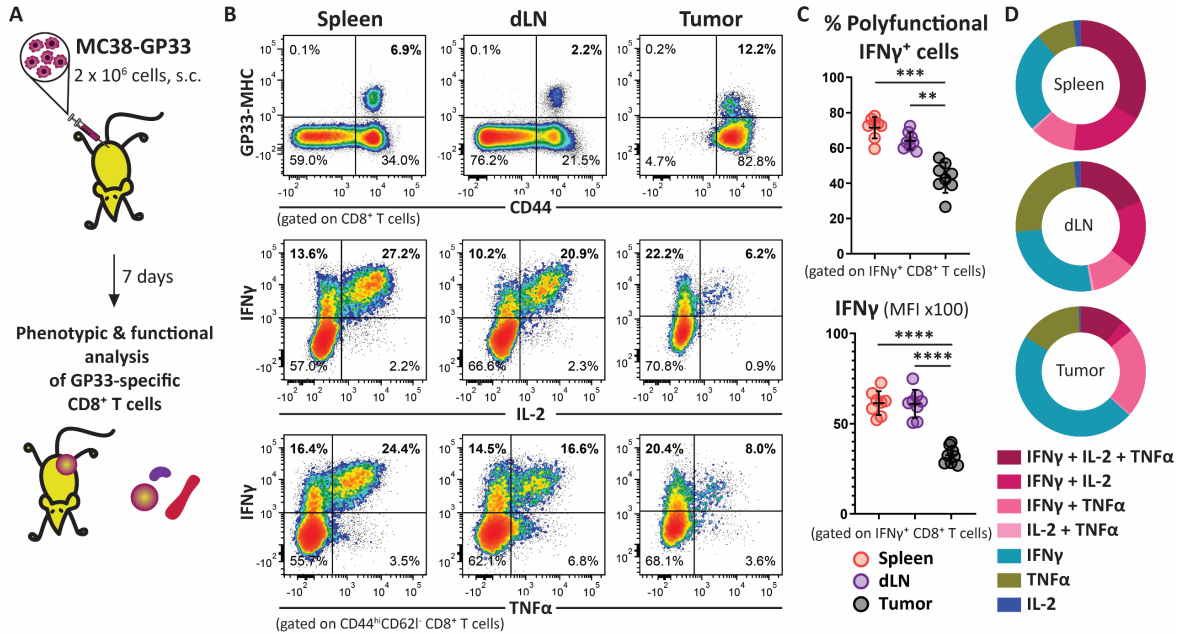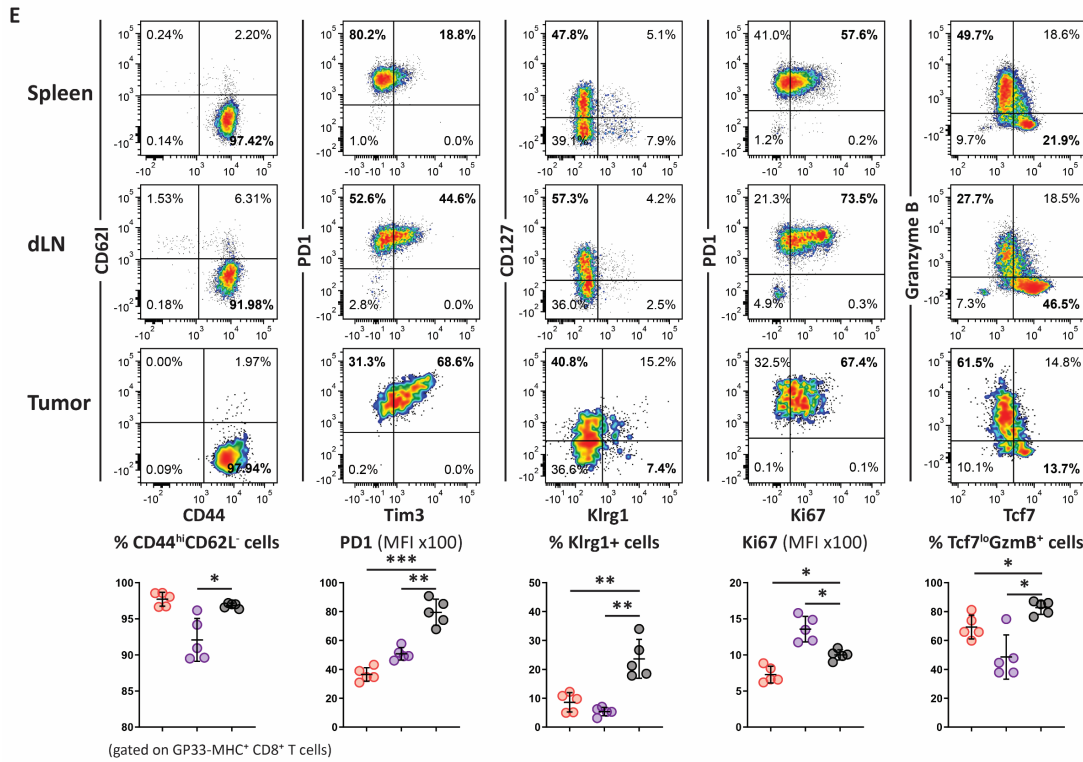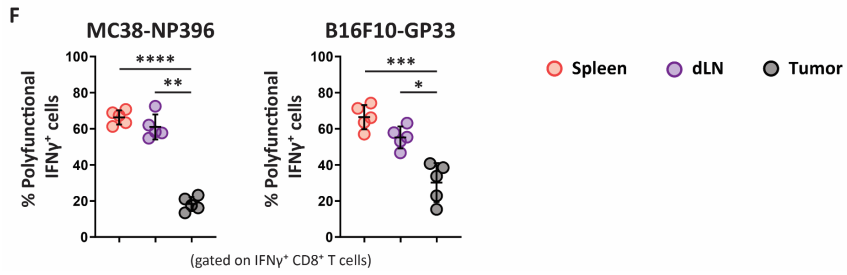

30 **Figure S1 Antigen specific CD8<sup>+</sup> T cells that infiltrate the tumors are functionally impaired compared to**  
31 **corresponding cells in peripheral lymphoid organs.**

32 (A) Schematic experimental design for panels (A-E): One to two million MC38-GP33 tumor cells were  
33 transplanted subcutaneously to immunocompetent, syngeneic (H-2b) hosts. One week later  
34 endogenous GP33-specific CD8<sup>+</sup> T cells isolated from peripheral lymphoid tissues or tumors were  
35 analyzed.

36 (B) Representative flow cytometry density plots showing the frequency of endogenous GP33-specific  
37 CD8<sup>+</sup> T cells (upper row) from the indicated tissues of TB mice and their potential to produce cytokines  
38 upon *ex vivo* stimulation with cognate peptide (2 bottom rows).

39 (C) Statistical analysis (n=8) of the cytokine profile shown in (B). Percent polyfunctionality is calculated as  
40 the percentage of IFN $\gamma$  producing cells that also co-produce TNF $\alpha$  or IL-2. Mean  $\pm$ SD; unpaired one-way  
41 Anova with Tukey correction.

42 (D) Functional composition of CD8<sup>+</sup> T cells is summarized in the pie charts, which are color-coded  
43 according to the polyfunctionality of CD8<sup>+</sup> T cells (n=8).

44 (E) Expression profile of differentiation (CD44, CD62L, Klrg1, CD127, TCF7), activation (PD1, Tim3),  
45 proliferation (Ki67), and effector molecule (Granzyme B) markers, on GP33-specific CD8<sup>+</sup> T cells from the  
46 indicated organs, 7 days post MC38-GP33 tumor cell transplantation on C57Bl6 mice. Summarized data  
47 for each marker are shown on the right of the corresponding flow plots. Mean  $\pm$ SD; unpaired one-way  
48 Anova with Tukey correction.

49 (F) One million MC38-NP396 or B16F10-GP33 tumor cells were transplanted subcutaneously to  
50 immunocompetent, syngeneic (H-2b) hosts (n=5). One week later endogenous NP396-specific or GP33-  
51 specific CD8<sup>+</sup> T cells isolated from peripheral lymphoid tissues or tumors were analyzed. Summarized  
52 data showing the frequency of polyfunctional IFN $\gamma$ <sup>+</sup> CD8<sup>+</sup> T cells upon *ex vivo* stimulation with NP396 or  
53 GP33 peptide respectively. Mean  $\pm$ SD; unpaired one-way Anova with Tukey correction.

54 A *p*-value of <0.05 is regarded as statistically significant, and different levels of significance are  
55 represented with asterisks: \**P*  $\leq$  0.05, \*\**P*  $\leq$  0.01, \*\*\**P*  $\leq$  0.001, and \*\*\*\**P*  $\leq$  0.0001.



56 **Figure S2**

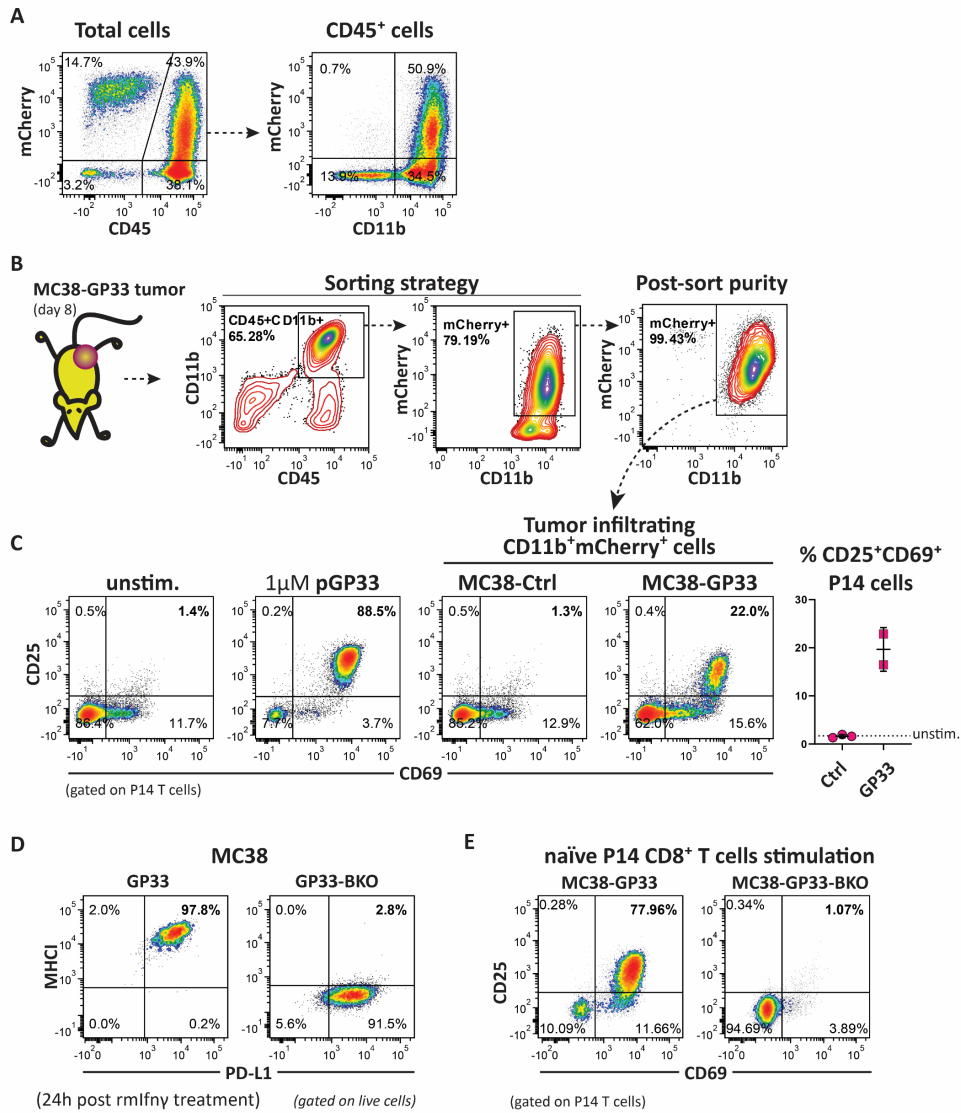

58 **Figure S2 Tumor infiltrating myeloid cells can uptake and cross-present tumor antigens.**

59 (A) Representative flow cytometry density plot showing detection of mCherry fluorescence in the tumor  
60 infiltrating leukocytes (CD45<sup>+</sup> cell fraction).

61 (B) Flow cytometry-based cell sorting strategy of tumor infiltrating CD45<sup>+</sup>CD11b<sup>+</sup>mCherry<sup>+</sup> cells from  
62 MC38-GP33 or MC38-Ctrl tumors established for 8 days in B57Bl6 mice.

63 (C) *In vitro* stimulation assay showing expression of early activation markers (CD25 and CD69) by naïve  
64 P14 CD8<sup>+</sup> T cells (responders) upon 4-hour coculture with CD11b<sup>+</sup>mCherry<sup>+</sup> cells (stimulators) isolated  
65 from MC38-Ctrl (n=3) or MC38-GP33 (n=2) tumors. Unstimulated (negative control) and peptide-  
66 stimulated (positive control) P14 CD8<sup>+</sup> T cells are shown for reference. The experiment was performed  
67 once.

68 (D) CRISPR-mediated ablation of B2m gene blocks expression of MHC class I molecules on the surface of  
69 MC38-GP33 tumor cells. Cells were treated with 20 ng/mL of rmlfng for 24h.

70 (E) *In vitro* stimulation assay showing expression of early activation markers (CD25 and CD69) by naïve  
71 P14 CD8<sup>+</sup> T cells upon 4-hour coculture with MC38-GP33 cell sufficient or deficient in MHCI.

72 A *p*-value of <0.05 is regarded as statistically significant, and different levels of significance are  
73 represented with asterisks: \**P* ≤ 0.05, \*\**P* ≤ 0.01, \*\*\**P* ≤ 0.001, and \*\*\*\**P* ≤ 0.0001.

74

75 **Figure S3**

**A P14 T cells early activation (day 3) - dLN**

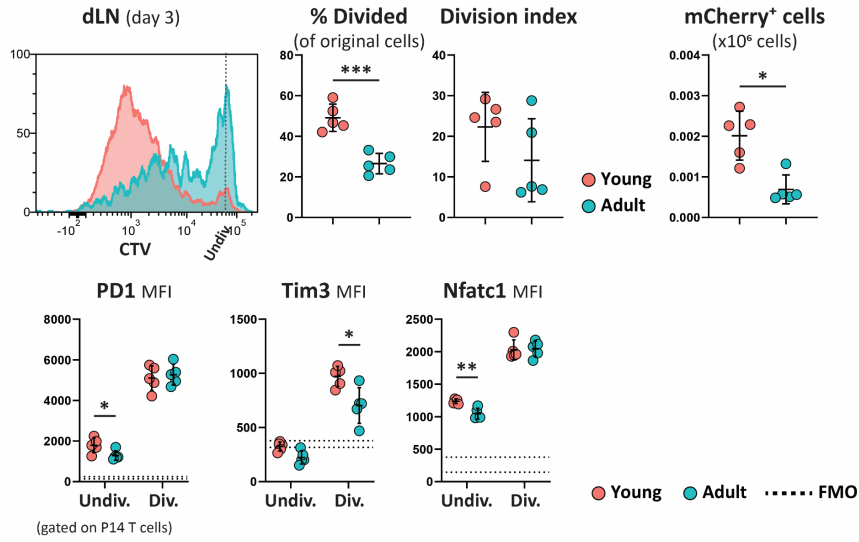

**B P14 T cells expansion and activation (day 7)**

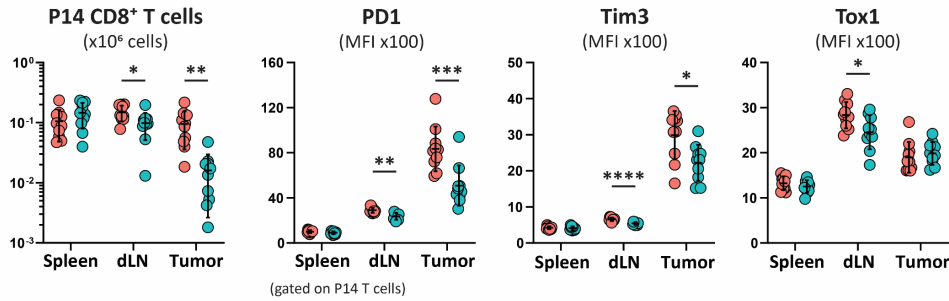

**C Tumor infiltrating mCherry<sup>+</sup> cells (day 7)**

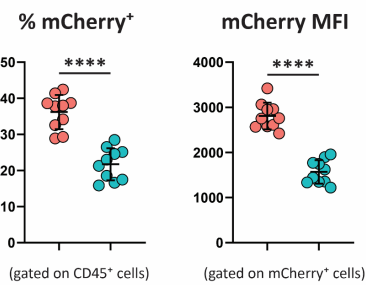

**D Correlation: T cell function vs antigen load**

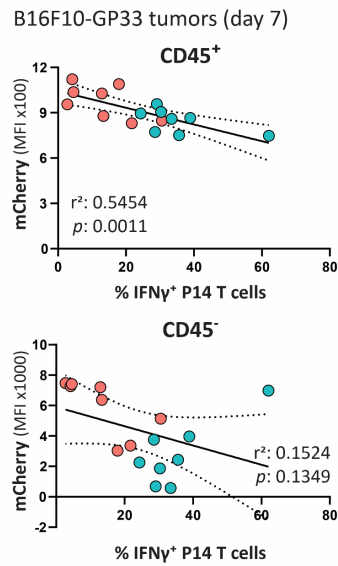

77 **Figure S3 Age related differences of CD8<sup>+</sup> T cell mediated immune response to B16F10-BKO-GP33**  
78 **tumor model.**

79 **(A)** CTV-labeled P14 CD8<sup>+</sup> T (100K) were adoptively transferred in young and adult mice (n=5 per group)  
80 one day before they were challenged with MHCI-deficient B16F10-GP33 cells. Proliferation and  
81 activation of P14 cells was assessed 3 days upon tumor challenge in the dLNs. The number of mCherry<sup>+</sup>  
82 cells in the dLNs was also calculated. Mean  $\pm$ SD; unpaired parametric Welch t-test. The experiment was  
83 performed once.

84 **(B)** Naïve P14 CD8<sup>+</sup> T cells (20K) were adoptively transferred in young or adult mice (n=10 per group) one  
85 day before they were challenged with MHCI-deficient B16F10-GP33 tumor cells. Expansion and  
86 activation of P14 T cells was assessed 7 days post tumor challenge. Mean  $\pm$ SD; multiple unpaired  
87 parametric Welch t-test. The experiment was performed once.

88 **(C)** Frequency and mCherry fluorescence intensity of myeloid cells infiltrating young or adult B16F10-  
89 BKO-GP33 tumors, 7 days post tumor challenge. Mean  $\pm$ SD; unpaired parametric Welch t-test.

90 **(D)** Naïve P14 CD8<sup>+</sup> T cells (10K) were adoptively transferred in young or adult mice (n=8 per group) one  
91 day before they were challenged with MHCI-proficient B16F10-GP33 tumor cells. One week later the  
92 functionality of tumor infiltrating P14 T cells was assessed. The percent of IFN $\gamma$  expressing P14 cells was  
93 inversely correlated with the mCherry intensity level of immune infiltrates but not that of the tumor  
94 cells. Simple linear regression analysis. The experiment was performed once.

95 A *p*-value of <0.05 is regarded as statistically significant, and different levels of significance are  
96 represented with asterisks: \**P*  $\leq$  0.05, \*\**P*  $\leq$  0.01, \*\*\**P*  $\leq$  0.001, and \*\*\*\**P*  $\leq$  0.0001.

97

98 **Figure S4**

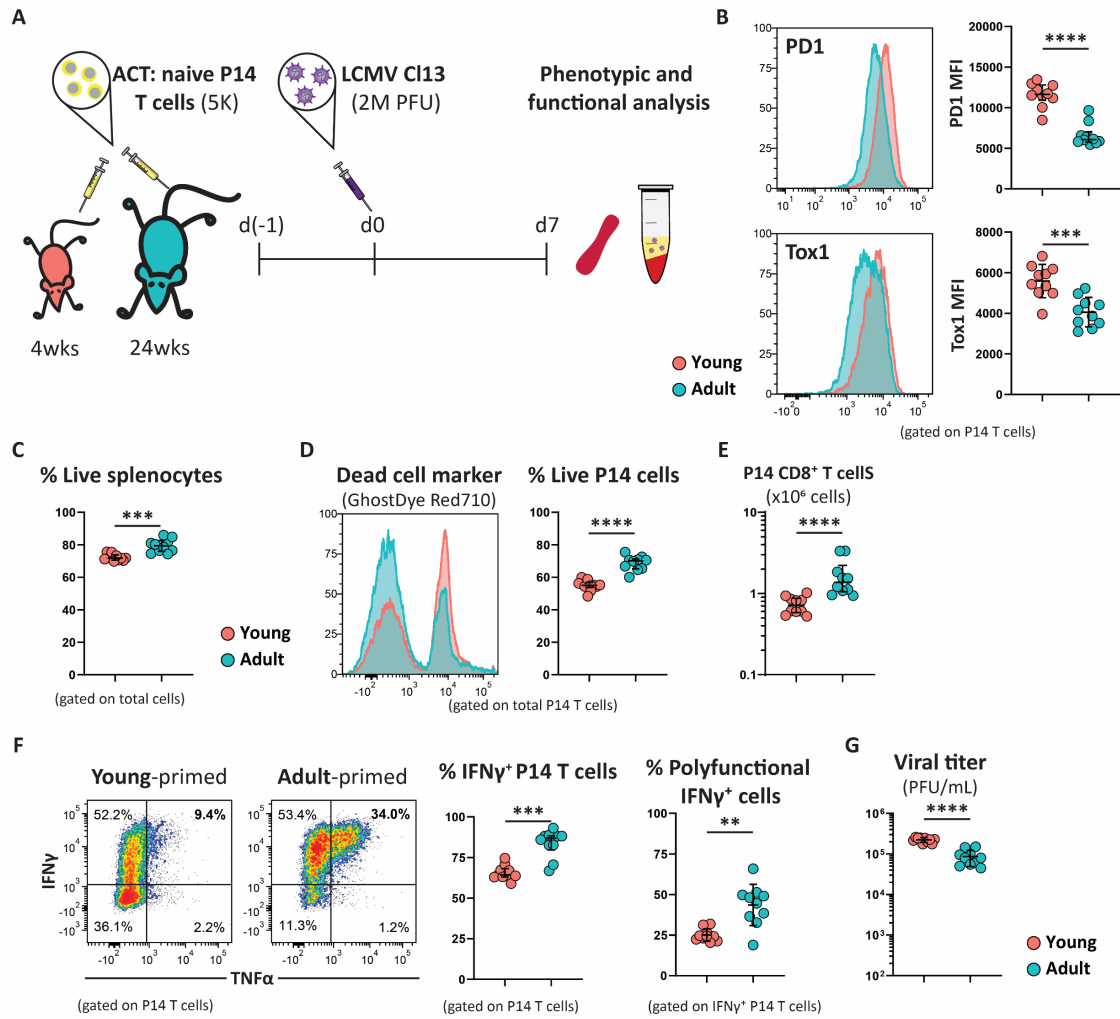

100 **Figure S4 CD8<sup>+</sup> T cell functional exhaustion is exacerbated in chronically infected young mice.**

101 (A) Schematic experimental design: Five thousand naïve CD90.1<sup>+</sup> P14 CD8<sup>+</sup> T cells were adoptively  
102 transferred into young (4-weeks; n=10) or adult (24-weeks; n=10) C57Bl6 mice. One day later all mice  
103 were systematically challenged with 2M PFU of LCMV Cl13. Phenotypic and functional analysis was  
104 performed 7 days post infection. The experiment was performed once.

105 (B) Representative flow cytometry histogram plots (left) and summarized data (right) of the expression  
106 levels of PD1 and Tox1 by the transferred P14 CD8<sup>+</sup> T cells. Mean  $\pm$ SD; unpaired Welch t-test.

107 (C) Frequency of live splenocytes from young and adult infected mice. Mean  $\pm$ SD; unpaired Welch t-test.

108 (D) Representative flow cytometry histogram plots (left) and summarized data (right) of the frequency  
109 of live (dead cell marker negative) P14 CD8<sup>+</sup> T cells from the spleens of young and adult infected mice.  
110 Mean  $\pm$ SD; unpaired Welch t-test.

111 (E) Total cell number of splenic P14 CD8<sup>+</sup> T cells expanded in the young or adult infected mice. Mean  
112  $\pm$ SD; unpaired Welch t-test.

113 (F) Representative flow cytometry density plots (left) and summarized data (right) of the cytokine  
114 response upon *ex vivo* stimulation of P14 CD8<sup>+</sup> T cells with GP33 peptide. Mean  $\pm$ SD; unpaired Welch t-  
115 test.

116 (G) Viral titers of the peripheral blood plasma isolated from young or adult infected mice. Mean  $\pm$ SD;  
117 unpaired Welch t-test.

118 A *p*-value of <0.05 is regarded as statistically significant, and different levels of significance are  
119 represented with asterisks: \**P*  $\leq$  0.05, \*\**P*  $\leq$  0.01, \*\*\**P*  $\leq$  0.001, and \*\*\*\**P*  $\leq$  0.0001.

120

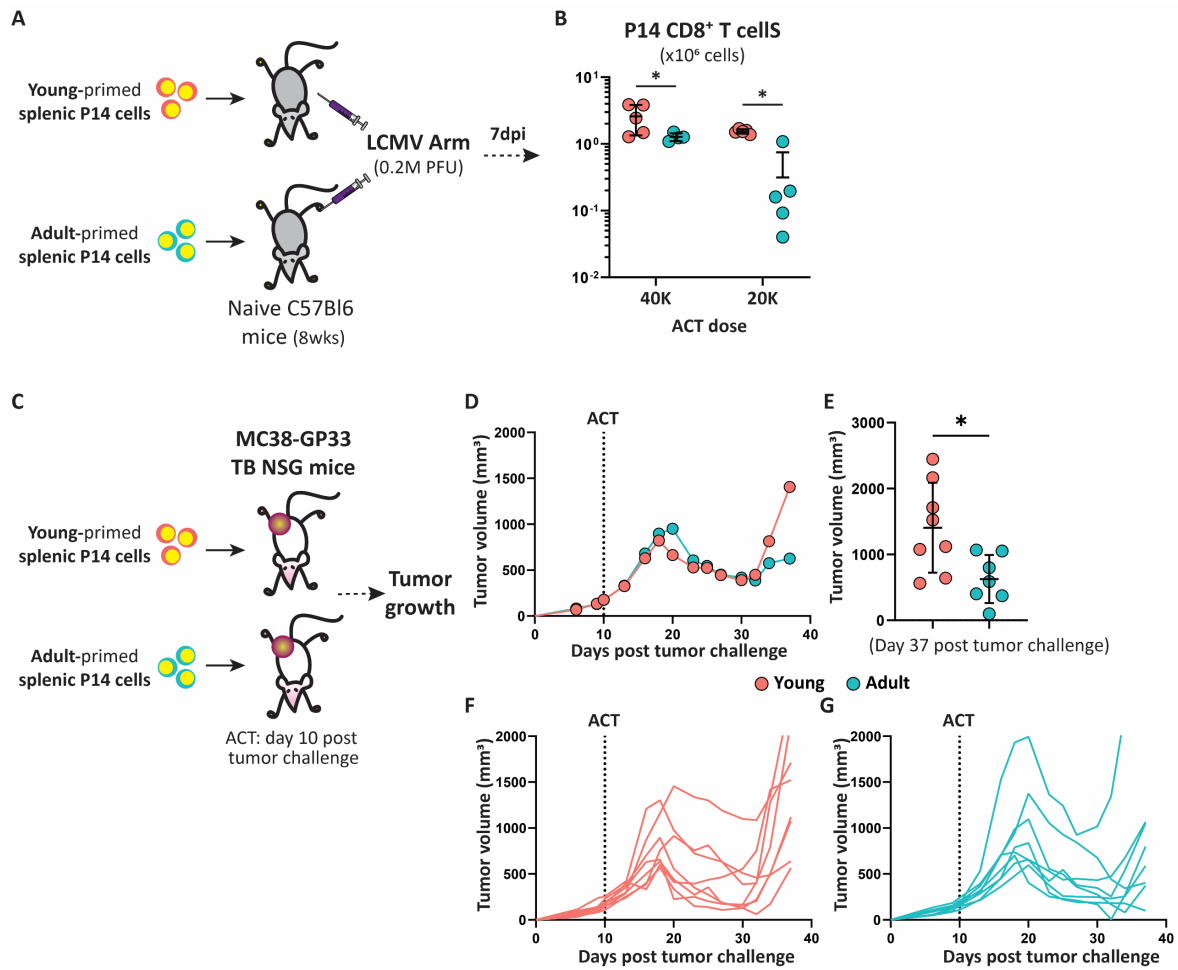

123 **Figure S5 Young-primed CD8<sup>+</sup> T cells are skewed toward a terminal effector state.**

124 (A) Schematic experimental design: young- or adult-primed P14 CD8<sup>+</sup> T cells, isolated from the spleens of  
125 TB mice at day 7, were adoptively transferred to naïve C57Bl6 mice at 2 different doses (40K and 20K).  
126 The next day the secondary hosts were challenged with LCMV Arm, and expansion of transferred cells  
127 was estimated 1 week later. The experiment was performed once.

128 (B) Total number of P14 CD8<sup>+</sup> T cells from the spleens of infected mice (n=5 per each group). Mean  $\pm$ SD;  
129 multiple unpaired Welch t-test.

130 (C) Schematic experimental design: young- or adult-primed P14 CD8<sup>+</sup> T cells, isolated from the spleens of  
131 TB mice at day 7, were transferred to MC38-GP33 TB immunocompromised mice (day 10 post tumor  
132 challenge).

133 (D) Mean tumor growth kinetics of NSG mice.

134 (E) Tumor volumes of NSG mice at day 37. Mean  $\pm$ SD; unpaired Welch t-test.

135 (F) Tumor growth kinetics of individual mice per each age group (n=8).

136 A *p*-value of <0.05 is regarded as statistically significant, and different levels of significance are  
137 represented with asterisks: \**P*  $\leq$  0.05, \*\**P*  $\leq$  0.01, \*\*\**P*  $\leq$  0.001, and \*\*\*\**P*  $\leq$  0.0001.

138



**A Intracellular antigen**

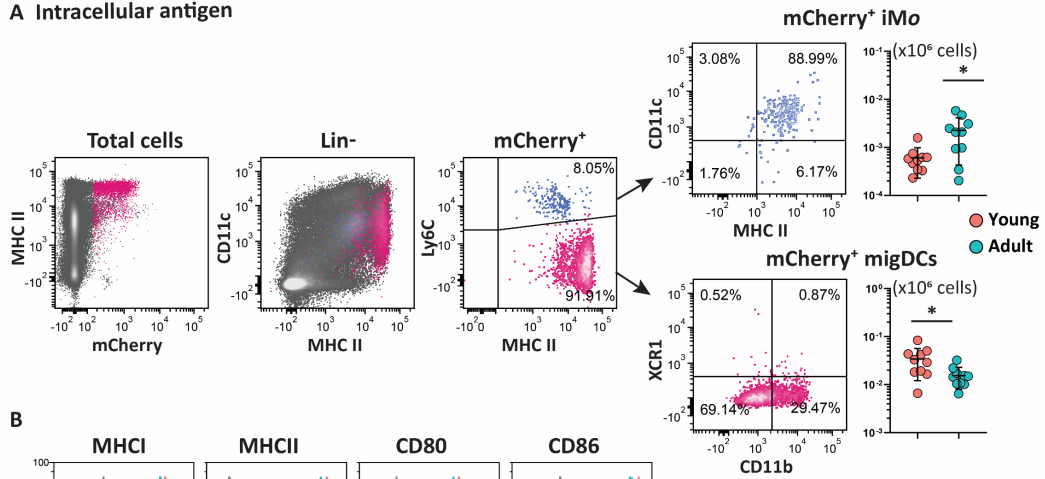

**B**

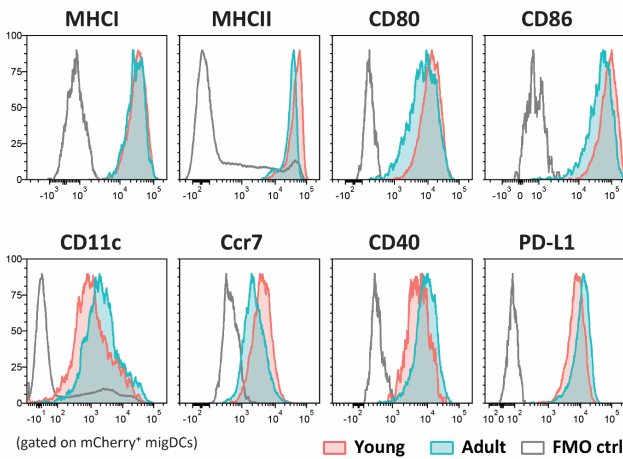

**C Soluble antigen**

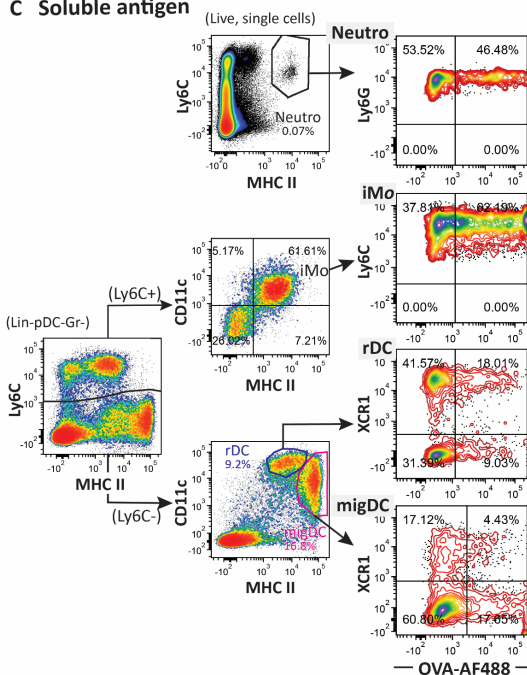

**D**

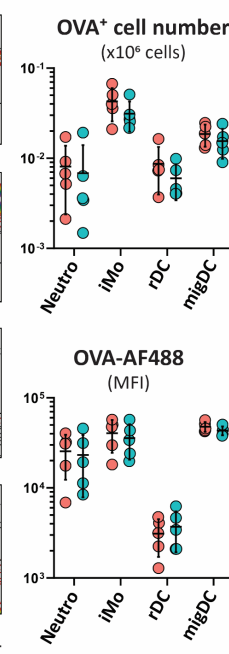

**E**

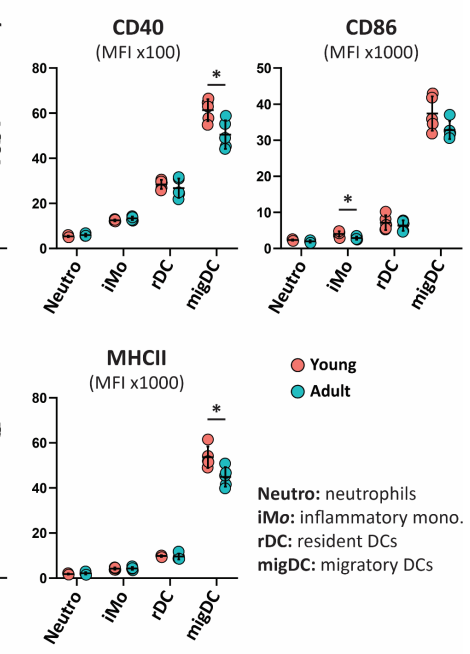

141 **Figure S6 Composition and abundance of APCs that uptake and transfer antigen to the dLN of young**  
142 **and adult mice.**

143 **(A)** Young (4-weeks old; n=10) and adult (24-weeks old; n=10) C57Bl6 mice were inoculated s.c. with  
144 apoptotic MC38-GP33-BKO cells, and the APCs present in the draining lymph nodes were analyzed 18  
145 hours later. Representative flow cytometry plots showing the phenotype of mCherry<sup>+</sup> DCs from the dLNs  
146 of young and adult mice. Mean  $\pm$ SD; unpaired Welch t-test.

147 **(B)** Representative histogram plots showing the expression of the indicated markers on the cell surface  
148 of the mCherry<sup>+</sup> migDCs from the dLNs of young and adult mice from (A). The gray line shows the  
149 autofluorescence level of the corresponding channel of the appropriate FMO control sample; for the  
150 MHCII and CD11c markers, which are used to define the migDC subset, the gray line shows the  
151 expression of MHCII and CD11c on total CD11b<sup>+</sup> cells.

152 **(C)** Young (4-weeks old; n=5) and adult (24-weeks old; n=5) C57Bl6 mice were vaccinated s.c. with OVA-  
153 AF488 protein emulsified in CFA, and APCs present in the draining lymph nodes were analyzed 18 hours  
154 later. Representative flow cytometry plots showing the gating strategy of myeloid subsets that have  
155 captured OVA protein. [neutro: neutrophils; iMo: inflammatory monocytes; rDC: resident DC; migDC:  
156 migratory DC]

157 **(D)** Total cell number (left) and fluorescent intensity (right) of the OVA<sup>+</sup> fraction of the indicated cell  
158 subsets isolated from the dLN of young or adult mice. Mean  $\pm$ SD; multiple unpaired Welch t-test.

159 **(E)** Summarized data showing the expression intensity of activation markers on the indicated cell  
160 subsets. Mean  $\pm$ SD; multiple unpaired Welch t-test.

161 A *p*-value of <0.05 is regarded as statistically significant, and different levels of significance are  
162 represented with asterisks: \**P*  $\leq$  0.05, \*\**P*  $\leq$  0.01, \*\*\**P*  $\leq$  0.001, and \*\*\*\**P*  $\leq$  0.0001.

163

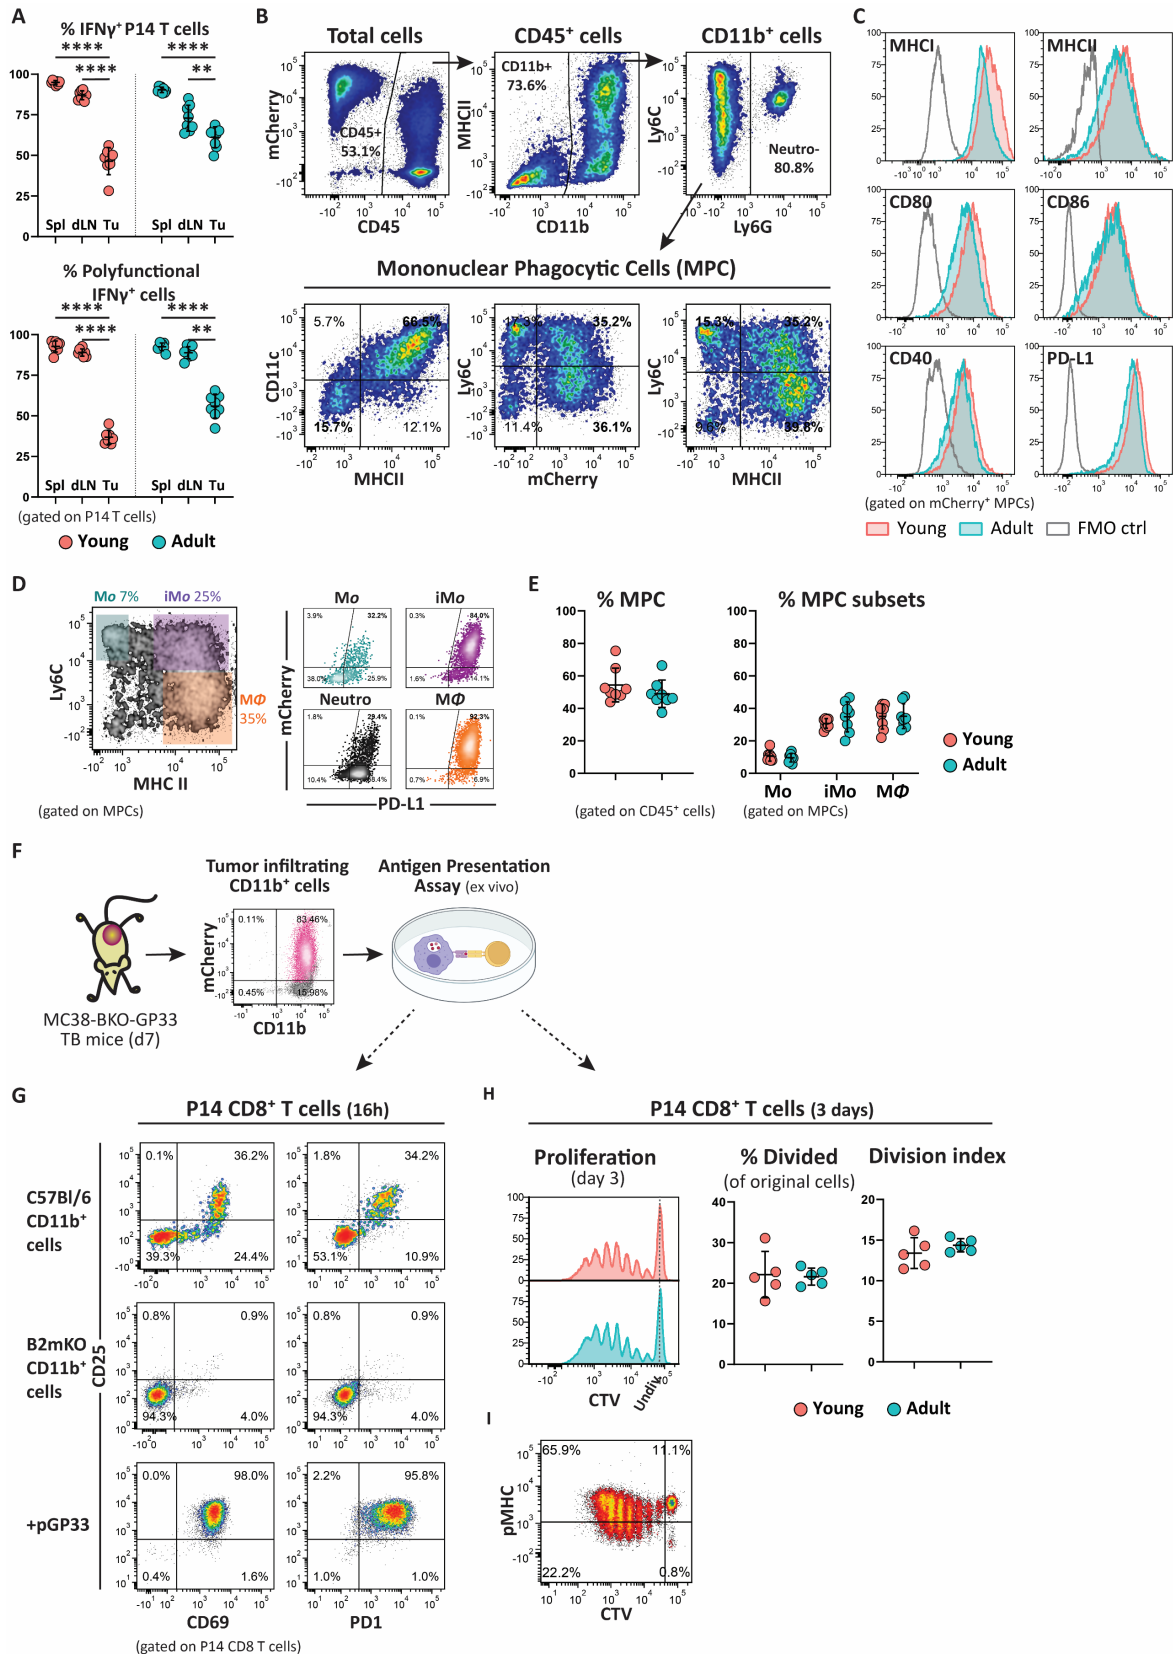

166 **Figure S7 Young tumor-infiltrating MPCs are more efficient at cross-presenting tumor antigens.**

167 (A) Summarized data showing cytokine production by young- and adult-primed P14 TILs from peripheral  
168 lymphoid tissues and tumors, upon 4h ex vivo stimulation with GP33 peptide. Mean  $\pm$ SD; multiple  
169 unpaired Welch t-test.

170 (B) Representative flow cytometry density plots showing the gating strategy for identification and  
171 characterization of mononuclear phagocytic cells (MPCs) from MC38-GP33-BKO tumors established for 7  
172 days in C57Bl/6 mice.

173 (C) Representative histogram plots showing the expression of the indicated markers on the surface of  
174 mCherry<sup>+</sup> MPCs from young or adult tumors. The gray lines represent the autofluorescence for the  
175 corresponding channel based on FMO control samples.

176 (D) Representative flow cytometry density plots showing immunophenotypic characterization of MPC  
177 subsets (left) and their ability to uptake tumor antigen (mCherry fluorescence) and express PD-L1 (right).  
178 (M $\phi$ : monocytes; iM $\phi$ : inflammatory monocytes; M $\Phi$ : macrophages)

179 (E) Summarized data showing the frequency of MPCs and their cellular composition in young and adult  
180 TB hosts. Mean  $\pm$ SD; multiple unpaired Welch t-test.

181 (F) Schematic experimental design of the antigen cross-presentation assay as in Fig. 4C.

182 (G) Representative flow cytometry density plots showing the activation of P14 CD8<sup>+</sup> T cells one day upon  
183 ex vivo stimulation with tumor infiltrating CD11b<sup>+</sup> cells from experimental mice (top row) or control  
184 B2mKO mice (middle row). Bottom row shows the activation of P14 cells upon addition of synthetic  
185 pGP33 peptide.

186 (H) Proliferation of CTV-labeled P14 CD8<sup>+</sup> T cells 3 days upon ex vivo stimulation with CD11b<sup>+</sup> tumor  
187 infiltrating myeloid cells. Mean  $\pm$ SD; unpaired Welch t-test.

188 (I) Representative density plot showing the density of TCR complex on the surface of P14 CD8<sup>+</sup> T cells as  
189 a function of cell divisions.

190 A *p*-value of <0.05 is regarded as statistically significant, and different levels of significance are  
191 represented with asterisks: \**P*  $\leq$  0.05, \*\**P*  $\leq$  0.01, \*\*\**P*  $\leq$  0.001, and \*\*\*\**P*  $\leq$  0.0001.

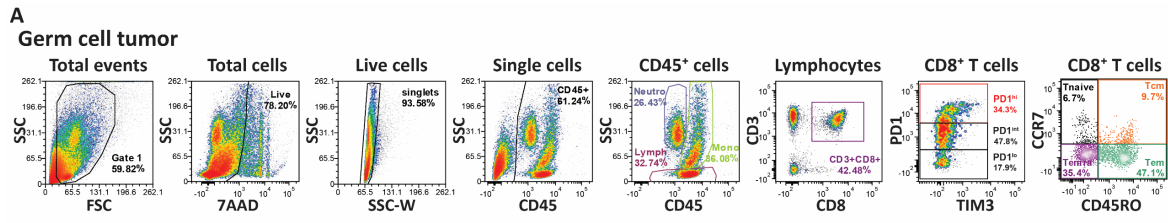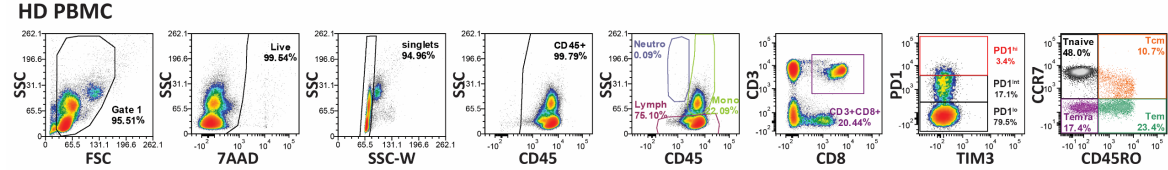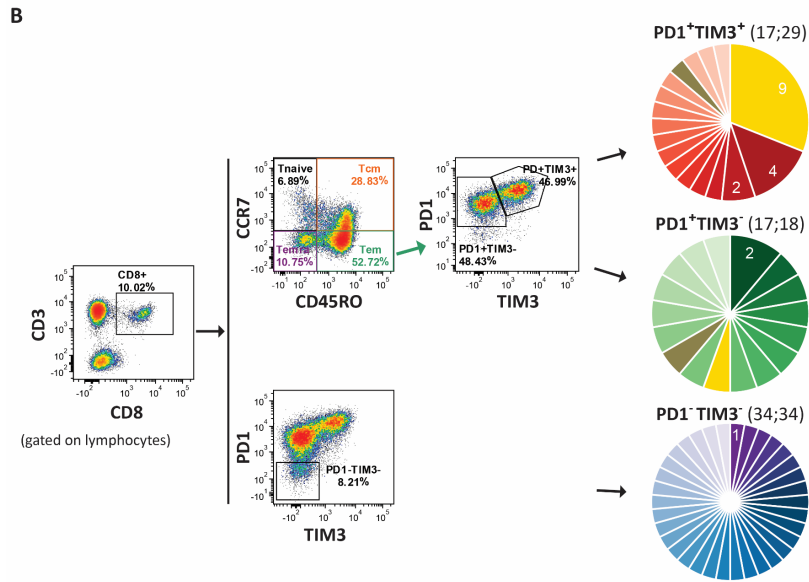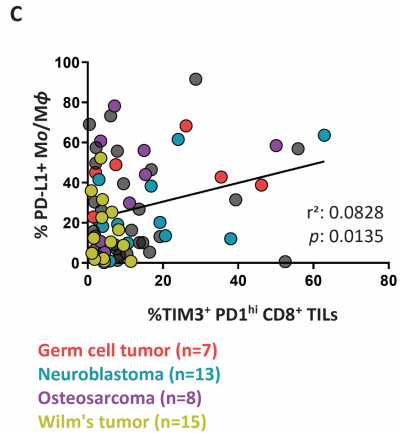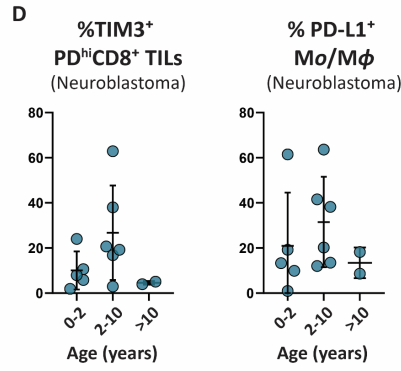

194 **Figure S8 CD8<sup>+</sup> T cells infiltrating pediatric solid tumors are enriched in antigen-experienced cells.**

195 (A) Flow cytometry “nested” gating strategy to identify and profile tumor infiltrating CD8<sup>+</sup> T cells (top

196 row). Equivalent gating strategy performed on PBMCs from a healthy donor (HD) is shown for reference

197 (bottom row). The current gate for the displayed events in each plot is indicated on top.

198 (B) Analysis of TCR repertoire diversity and clonotype composition of among CD8<sup>+</sup> TILs (Germ cell tumor

199 sample) with different expression levels of inhibitory receptors, PD1 and TIM3 (see sorting strategy on

200 the left). Each a/b clonotype is represented by a single pie-slice proportional to its frequency. Common

201 clonotypes among different CD8<sup>+</sup> phenotypes are represented by the same color.

202 (C) Correlation between the frequency of TIM3 expressing PD1<sup>high</sup> CD8<sup>+</sup> TILs and the percentage of

203 monocyte/macrophages that express PDL1 (n=73). Distribution of the most represented tumor types is

204 indicated (color coded). Simple linear regression analysis.

205 (D) Frequency of TIM3 expressing PD1<sup>high</sup> CD8<sup>+</sup> TILs (left) and the percentage of monocyte/macrophages

206 that express PDL1 (right) from 13 neuroblastoma tumor samples among different age groups. Mean

207 ±SD; unpaired Kruskal-Wallis test with Dunn’s correction.

208 A *p*-value of <0.05 is regarded as statistically significant, and different levels of significance are

209 represented with asterisks: \**P* ≤ 0.05, \*\**P* ≤ 0.01, \*\*\**P* ≤ 0.001, and \*\*\*\**P* ≤ 0.0001.

210

211 **Supplementary table**

212 Antibodies used in this study:

| <b>Antibody</b>                      | <b>Clone</b> | <b>Source</b> | <b>Catalog #</b> | <b>Antibody ID</b>          |
|--------------------------------------|--------------|---------------|------------------|-----------------------------|
| anti-mouse KLRG1-AF488               | 2F1          | BD            | 561619           | <a href="#">AB 10898017</a> |
| anti-mouse CD274-BV421               | MIH5         | BD            | 564716           | <a href="#">AB 2738911</a>  |
| anti-mouse TNF-BV421                 | MP6-XT22     | BD            | 563387           | <a href="#">AB 2738173</a>  |
| anti-mouse CD44-BV510                | IM7          | BD            | 563114           | <a href="#">AB 2738011</a>  |
| anti-mouse CD45-BV786                | 30-F11       | BD            | 564225           | <a href="#">AB 2716861</a>  |
| anti-mouse IFN $\gamma$ -APC         | XMG1.2       | BD            | 554413           | <a href="#">AB 398551</a>   |
| anti-human/mouse Ki67-BV786          | B56          | BD            | 563756           | <a href="#">AB 2732007</a>  |
| anti-mouse IL-2-AF488                | JES6-5H4     | BD            | 557725           | <a href="#">AB 396833</a>   |
| anti-mouse CD11b-BV510               | M1/70        | BD            | 562950           | <a href="#">AB 2737913</a>  |
| anti-mouse CD127-BV421               | A7R34        | BD            | 566377           | <a href="#">AB 2739717</a>  |
| anti-mouse CD90.1-PerCP              | OX-7         | BD            | 557266           | <a href="#">AB 396611</a>   |
| <b>7AAD</b>                          | n/a          | BD            | 559925           | n/a                         |
| anti-human PDL1-BV786                | MIH1         | BD            | 563739           | <a href="#">AB 2738397</a>  |
| anti-mouse PD1-PE                    | 29F.1A12     | BioLegend     | 135206           | <a href="#">AB 1877231</a>  |
| anti-mouse CD8 $\alpha$ -APC-Fire750 | 53-6.7       | BioLegend     | 100766           | <a href="#">AB 2572113</a>  |
| anti-human/mouse Granzyme B-PacBlue  | GB11         | BioLegend     | 515408           | <a href="#">AB 2562196</a>  |
| anti-mouse CD62L-BV605               | MEL-14       | BioLegend     | 104438           | <a href="#">AB 2563058</a>  |
| anti-mouse IA/IE-FITC                | M5/114.15.2  | Biolegend     | 107606           | <a href="#">AB 313321</a>   |
| anti-human/mouse CD45R/B220-PerCP    | RA3-6B2      | Biolegend     | 103234           | <a href="#">AB 893353</a>   |
| anti-mouse F4/80-PE                  | BM8          | Biolegend     | 123110           | <a href="#">AB 893486</a>   |
| anti-mouse CD11c-PECy7               | N418         | Biolegend     | 117318           | <a href="#">AB 493568</a>   |
| anti-mouse Ly-6C-APC-Fire750         | HK1.4        | Biolegend     | 128046           | <a href="#">AB 2616731</a>  |
| anti-mouse Ly-6G-BV605               | 1A8          | Biolegend     | 127639           | <a href="#">AB 2565880</a>  |
| anti-human CD39-BV510                | A1           | Biolegend     | 328219           | <a href="#">AB 2563265</a>  |
| anti-human CCR7-AF488                | G043H7       | Biolegend     | 353206           | <a href="#">AB 10916389</a> |
| anti-human PD1-PE                    | EH12.2H7     | Biolegend     | 329906           | <a href="#">AB 940483</a>   |
| anti-human TIM3-PE                   | F38-2E2      | Biolegend     | 345014           | <a href="#">AB 2561720</a>  |
| anti-human CD45RO-APC                | UCHL1        | Biolegend     | 304210           | <a href="#">AB 314426</a>   |
| anti-human CD3-APC-Cy7               | SK7          | Biolegend     | 344818           | <a href="#">AB 10645474</a> |
| anti-human CD8 $\alpha$ -BV421       | RPA-T8       | Biolegend     | 301036           | <a href="#">AB 10960142</a> |
| anti-human CD45-BV605                | HI30         | Biolegend     | 304042           | <a href="#">AB 2562106</a>  |
| anti-mouse H2-D/Kb-AF647             | 28-8-6       | Biolegend     | 114612           | <a href="#">AB 492931</a>   |
| anti-mouse CD25-PE                   | 3C7          | BioLegend     | 101904           | <a href="#">AB 312847</a>   |
| anti-mouse CD69-BV605                | H1.2F3       | BioLegend     | 104530           | <a href="#">AB 11203710</a> |
| anti-mouse Ccr7-AF488                | 4B12         | BioLegend     | 120110           | <a href="#">AB 492841</a>   |
| anti-mouse Xcr1-BV421                | ZET          | BioLegend     | 148216           | <a href="#">AB 2565230</a>  |
| anti-mouse CD64-PE                   | X54-5/7.1    | Biolegend     | 139304           | <a href="#">AB 10612740</a> |

| <b>Antibody</b>                          | <b>Clone</b> | <b>Source</b>  | <b>Catalog #</b> | <b>Antibody ID</b>                 |
|------------------------------------------|--------------|----------------|------------------|------------------------------------|
| <b>anti-mouse CD80-PE</b>                | 16-10A1      | Biologend      | 104708           | <a href="#"><u>AB 313129</u></a>   |
| <b>anti-mouse CD40-AF488</b>             | HM40-3       | Biologend      | 102910           | <a href="#"><u>AB 492852</u></a>   |
| <b>anti-mouse CD86-BV421</b>             | GL-1         | Biologend      | 105032           | <a href="#"><u>AB 2650895</u></a>  |
| <b>anti-human/mouse Nfatc1-AF488</b>     | 7A6          | Biologend      | 649604           | <a href="#"><u>AB 2561823</u></a>  |
| <b>anti-human/mouse Irf4-AF647</b>       | IRF4.3E4     | Biologend      | 646408           | <a href="#"><u>AB 2564047</u></a>  |
| <b>Annexin V-PE-Cy7</b>                  |              | Biologend      | 640950           |                                    |
| <b>anti-mouse CD206-PerCP-Cy5.5</b>      | C068C2       | Biologend      | 141716           | <a href="#"><u>AB 2561992</u></a>  |
| <b>anti-mouse/human TCF7-AF488</b>       | C63D9        | Cell Signaling | 6444S            | <a href="#"><u>AB 2797627</u></a>  |
| <b>anti-human/mouse Tcf7-AF488</b>       | C63D9        | Cell Signaling | 6444S            | <a href="#"><u>AB 2797627</u></a>  |
| <b>anti-mouse Tim3-PeCy7</b>             | RMT3-23      | eBioscience    | 25-5870-82       | <a href="#"><u>AB 2573483</u></a>  |
| <b>anti-human/mouse TOX1-eFluor660</b>   | TXRX10       | eBioscience    | 50-6502-82       | <a href="#"><u>AB 2574265</u></a>  |
| <b>anti-mouse CD39-PerCP-eFluor710</b>   | 24DMS1       | eBioscience    | 46-0391-82       | <a href="#"><u>AB 10717953</u></a> |
| <b>anti-mouse Nur77-AF488</b>            | 12.14        | eBioscience    | 53-5965-82       | <a href="#"><u>AB 2574429</u></a>  |
| <b>anti-human/mouse Arginase1-AF488</b>  | A1exF5       | eBioscience    | 53-3697-82       | <a href="#"><u>AB 2734831</u></a>  |
| <b>anti-human/mouse Tox-APC</b>          | TXRX10       | eBioscience    | 50-6502-82       | <a href="#"><u>AB 2574265</u></a>  |
| <b>anti-mouse iNOS-APC</b>               | REA982       | Miltenyi       | 130-116-359      | <a href="#"><u>AB 2727487</u></a>  |
| <b>anti-human/mouse Tox-APC</b>          | REA473       | Miltenyi       | 130-118-335      | <a href="#"><u>AB 2751485</u></a>  |
| <b>Ghost Dye Red 710</b>                 | n/a          | Tonbo          | 13-0871-T500     | n/a                                |
| <b>anti-mouse TCRbeta-PerCP-Cy5.5</b>    | H57-597      | Tonbo          | 65-5961-U100     | <a href="#"><u>AB 2621911</u></a>  |
| <b>anti-mouse NK1.1-PerCPCy5.5</b>       | PK136        | Tonbo          | 65-5941-U100     | <a href="#"><u>AB 2621910</u></a>  |
| <b>anti-human/mouse B220-PerCP-Cy5.5</b> | RA3-6B2      | Tonbo          | 65-0452-U100     | <a href="#"><u>AB 2621892</u></a>  |
| <b>anti-mouse CD19-PerCP-Cy5.5</b>       | 1D3          | Tonbo          | 65-0193-U100     | <a href="#"><u>AB 2621887</u></a>  |
